# Supplementary material for: Unique tRNA gene profile suggests paucity of nucleotide modifications in anticodons of a deep-sea symbiotic Spiroplasma
Source: PubMed Central journal article supplement — Nucleic Acids Res. 2018 Jan 30;46(5):2197–203. doi: 10.1093/nar/gky045 (PMC5861454; doi:10.1093/nar/gky045), 2018-01-30
Supplement: gky045_supp.pdf [file gky045_supp.pdf]

Table S1. Housekeeping genes for codon usage measurement

| Gene ID    | Abbreviation | Protein                               |
|------------|--------------|---------------------------------------|
| PF00281.14 | <i>rplE</i>  | Ribosomal protein L5                  |
| PF00297.17 | <i>rplC</i>  | Ribosomal protein L3                  |
| PF00347.18 | <i>rplF</i>  | Ribosomal protein L6                  |
| PF00416.17 | <i>rpsM</i>  | Ribosomal protein S13/S18             |
| PF00573.17 | <i>rplD</i>  | Ribosomal protein L4/L1 family        |
| TIGR00116  | <i>tsf</i>   | translation elongation factor Ts      |
| TIGR00158  | <i>rplK</i>  | ribosomal protein L9                  |
| TIGR00855  | <i>rplL</i>  | ribosomal protein L7/L12              |
| TIGR01009  | <i>rpsC</i>  | ribosomal protein S3                  |
| TIGR01011  | <i>rpsB</i>  | ribosomal protein S2                  |
| TIGR01021  | <i>rpsE</i>  | ribosomal protein S5                  |
| PF00380.14 | <i>rpsI</i>  | Ribosomal protein S9/S16              |
| TIGR01067  | <i>rplN</i>  | ribosomal protein L14                 |
| TIGR01164  | <i>rplP</i>  | ribosomal protein L16                 |
| TIGR01169  | <i>rplA</i>  | ribosomal protein L1                  |
| TIGR01171  | <i>rplB</i>  | ribosomal protein L2                  |
| TIGR01632  | <i>rplK</i>  | ribosomal protein L11                 |
| TIGR01953  | <i>nusA</i>  | transcription termination factor NusA |

Table S2. The close relatives of “*Ca. Spiroplasma holothuricola*” and symbionts for comparison

| Species                                             | Accession         |
|-----------------------------------------------------|-------------------|
| <i>Spiroplasma chrysopicola</i> DF 1                | CP005077          |
| <i>Spiroplasma apis</i> B31                         | CP006682          |
| <i>Spiroplasma diminutum</i> CUAS 1                 | CP005076          |
| <i>Spiroplasma syrphidicola</i> EA 1                | NC 021284         |
| <i>Spiroplasma taiwanense</i> CT 1                  | CP005074          |
| <i>Mycoplasma suis</i> KI3806                       | NC_015153         |
| <i>Mycoplasma</i> sp. Bg1                           | PRJNA309720       |
| <i>Mycoplasma</i> sp. Bg2                           | PRJNA309720       |
| <i>Buchnera aphidicola</i>                          | NC 002528         |
| " <i>Candidatus</i> Moranella endobia"              | NC 01573          |
| " <i>Candidatus</i> Nasuia deltocephalinicola"      | CP013211;CP013212 |
| <i>Ureaplasma urealyticum</i> serovar 10 ATCC 33699 | NC_002162         |
| " <i>Candidatus</i> Spiroplasma holothuricola"      | CP022928;CP022929 |

Table S3. tRNA genes in “*Ca. Spiroplasma holothuricola*” genome

| ID       | chromosome | start         | end           | AA type       | anticodon  |
|----------|------------|---------------|---------------|---------------|------------|
| 2_trna3  | 2          | 115516        | 115592        | Elongator Met | CAT        |
| 1_trna3  | 1          | 120679        | 120756        | Initiator Met | CAT        |
| 1_trna8  | 1          | 108012        | 107937        | Ala           | TGC        |
| 1_trna27 | <b>1</b>   | <b>83108</b>  | <b>83033</b>  | <b>Arg</b>    | <b>TCT</b> |
| 1_trna12 | <b>1</b>   | <b>210086</b> | <b>210012</b> | <b>Arg</b>    | <b>CCT</b> |
| 2_trna2  | 2          | 111918        | 111994        | Arg           | TCG        |
| 1_trna15 | 1          | 246627        | 246553        | Asn           | GTT        |
| 2_trna4  | 2          | 118414        | 118488        | Asp           | GTC        |
| 1_trna2  | 1          | 108146        | 108069        | Cys           | GCA        |
| 1_trna12 | <b>1</b>   | <b>223027</b> | <b>223101</b> | <b>Gln</b>    | <b>TTG</b> |
| 1_trna6  | <b>1</b>   | <b>176362</b> | <b>176436</b> | <b>Gln</b>    | <b>CTG</b> |
| 1_trna18 | <b>1</b>   | <b>246527</b> | <b>246452</b> | <b>Glu</b>    | <b>TTC</b> |
| 1_trna17 | <b>1</b>   | <b>246424</b> | <b>246349</b> | <b>Glu</b>    | <b>CTC</b> |
| 1_trna9  | 1          | 213976        | 214049        | Gly           | TCC        |
| 1_trna26 | 1          | 105173        | 105098        | His           | GTG        |
| 1_trna22 | 1          | 120859        | 120934        | Ile           | GAT        |
| 1_trna23 | 1          | 209920        | 209994        | Ile           | TAT        |
| 1_trna5  | 1          | 176238        | 176325        | Leu           | GAG        |
| 1_trna7  | 1          | 183226        | 183311        | Leu           | TAG        |
| 1_trna14 | <b>1</b>   | <b>224541</b> | <b>224627</b> | <b>Leu</b>    | <b>TAA</b> |
| 1_trna16 | <b>1</b>   | <b>230619</b> | <b>230705</b> | <b>Leu</b>    | <b>CAA</b> |
| 1_trna13 | <b>1</b>   | <b>224465</b> | <b>224539</b> | <b>Lys</b>    | <b>TTT</b> |
| 2_trna1  | <b>2</b>   | <b>66201</b>  | <b>66276</b>  | <b>Lys</b>    | <b>CTT</b> |
| 2_trna5  | 2          | 118490        | 118564        | Phe           | GAA        |
| 1_trna19 | 1          | 107930        | 107852        | Pro           | TGG        |
| 1_trna4  | 1          | 120952        | 121042        | Ser           | TGA        |
| 1_trna20 | 1          | 246765        | 246859        | Ser           | GCT        |
| 1_trna11 | 1          | 222851        | 222928        | Thr           | TGT        |
| 1_trna1  | <b>1</b>   | <b>117</b>    | <b>190</b>    | <b>Trp</b>    | <b>TCA</b> |
| 1_trna21 | <b>1</b>   | <b>252493</b> | <b>252566</b> | <b>Trp</b>    | <b>CCA</b> |
| 1_trna24 | 1          | 222930        | 223014        | Tyr           | GTA        |
| 1_trna10 | 1          | 222770        | 222845        | Val           | TAC        |

Table S4. tRNAs in transcriptomic data as identified by Blastn

| frag<br>ment | subject<br>ID | tRNA<br>Type | anti-<br>codon | %<br>identity | aligned<br>region(bp) | query<br>start | query<br>end | subject<br>start | subject<br>end | e-value  |
|--------------|---------------|--------------|----------------|---------------|-----------------------|----------------|--------------|------------------|----------------|----------|
| 1            | 1_trna10      | Val          | TAC            | 100           | 43                    | 1              | 43           | 53               | 11             | 1E-21    |
| 2            | 1_trna11      | Thr          | TGT            | 100           | 47                    | 1              | 47           | 75               | 29             | 6.00E-24 |
| 3            | 1_trna16      | Leu          | CAA            | 100           | 36                    | 2              | 37           | 83               | 48             | 2.00E-17 |
| 4            | 1_trna26      | His          | GTG            | 100           | 43                    | 1              | 43           | 59               | 17             | 1E-21    |
| 5            | 1_trna26      | His          | GTG            | 100           | 59                    | 2              | 60           | 75               | 17             | 8.00E-29 |
| 6            | 1_trna26      | His          | GTG            | 100           | 39                    | 1              | 39           | 51               | 13             | 9.00E-18 |
| 7            | 1_trna27      | Arg          | TCT            | 100           | 37                    | 1              | 37           | 40               | 76             | 1.00E-16 |
| 8            | 1_trna27      | Arg          | TCT            | 100           | 31                    | 26             | 56           | 76               | 46             | 3.00E-13 |
| 9            | 1_trna27      | Arg          | TCT            | 100           | 29                    | 23             | 51           | 76               | 48             | 3.00E-12 |
| 10           | 1_trna4       | Ser          | TGA            | 100           | 41                    | 1              | 41           | 61               | 21             | 2.00E-20 |
| 11           | 1_trna5       | Leu          | GAG            | 100           | 53                    | 1              | 53           | 69               | 17             | 1.00E-25 |
| 12           | 1_trna5       | Leu          | GAG            | 100           | 63                    | 1              | 63           | 9                | 71             | 5.00E-31 |
| 13           | 1_trna7       | Leu          | TAG            | 100           | 58                    | 1              | 58           | 10               | 67             | 3.00E-28 |
| 14           | 1_trna7       | Leu          | TAG            | 100           | 57                    | 1              | 57           | 69               | 13             | 1.00E-27 |
| 15           | 1_trna9       | Gly          | TCC            | 100           | 47                    | 1              | 47           | 70               | 24             | 6.00E-24 |
| 16           | 1_trna9       | Gly          | TCC            | 100           | 59                    | 23             | 81           | 74               | 16             | 1.00E-28 |
| 17           | 2_trna2       | Arg          | TCG            | 100           | 49                    | 4              | 52           | 77               | 29             | 2.00E-23 |
| 18           | 2_trna2       | Arg          | TCG            | 100           | 49                    | 4              | 52           | 77               | 29             | 2.00E-23 |
| 19           | 2_trna3       | Met          | CAT            | 100           | 39                    | 1              | 39           | 39               | 1              | 3.00E-19 |
| 20           | 2_trna3       | Met          | CAT            | 100           | 39                    | 1              | 39           | 39               | 1              | 3.00E-19 |

The tRNA IDs were described in Table S1. The query and subject of the Blastn search were the Illumina cDNA fragments and tRNA genes, respectively.
